# Supplementary material for: Spectroscopic study on the binding of a cationic porphyrin to DNAG-quadruplex under different K+ concentrations
Source: Royal Society of Chemistry journal article supplement (doi:10.1039/b809322a), 2008-06-30
Supplement: b809322a.pdf [file b809322a.pdf]

## Supporting Information

S1

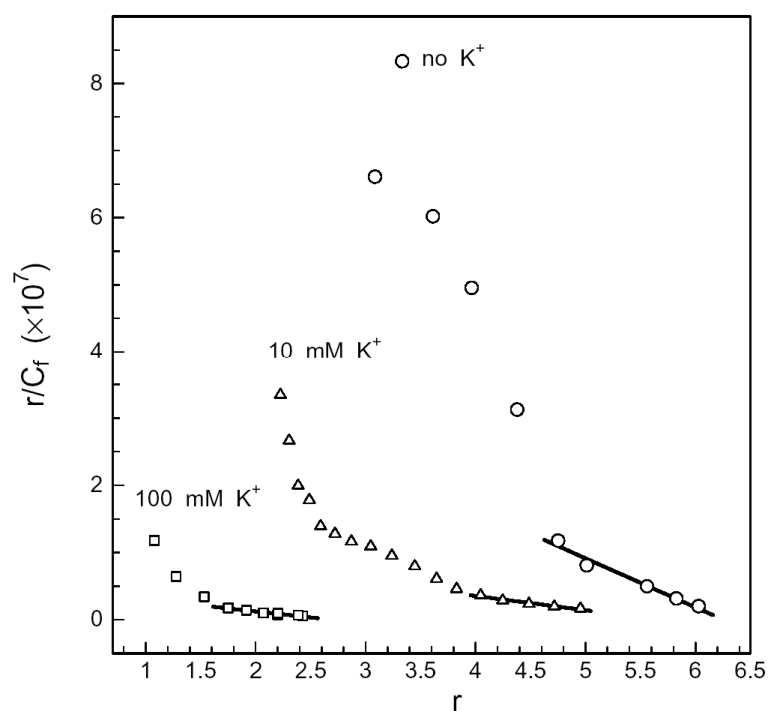

S1. Scatchard plots used to analysis the binding behavior for TMPyP4 and G4 in the presence of 0, 10 mM, and 100 mM K<sup>+</sup>.

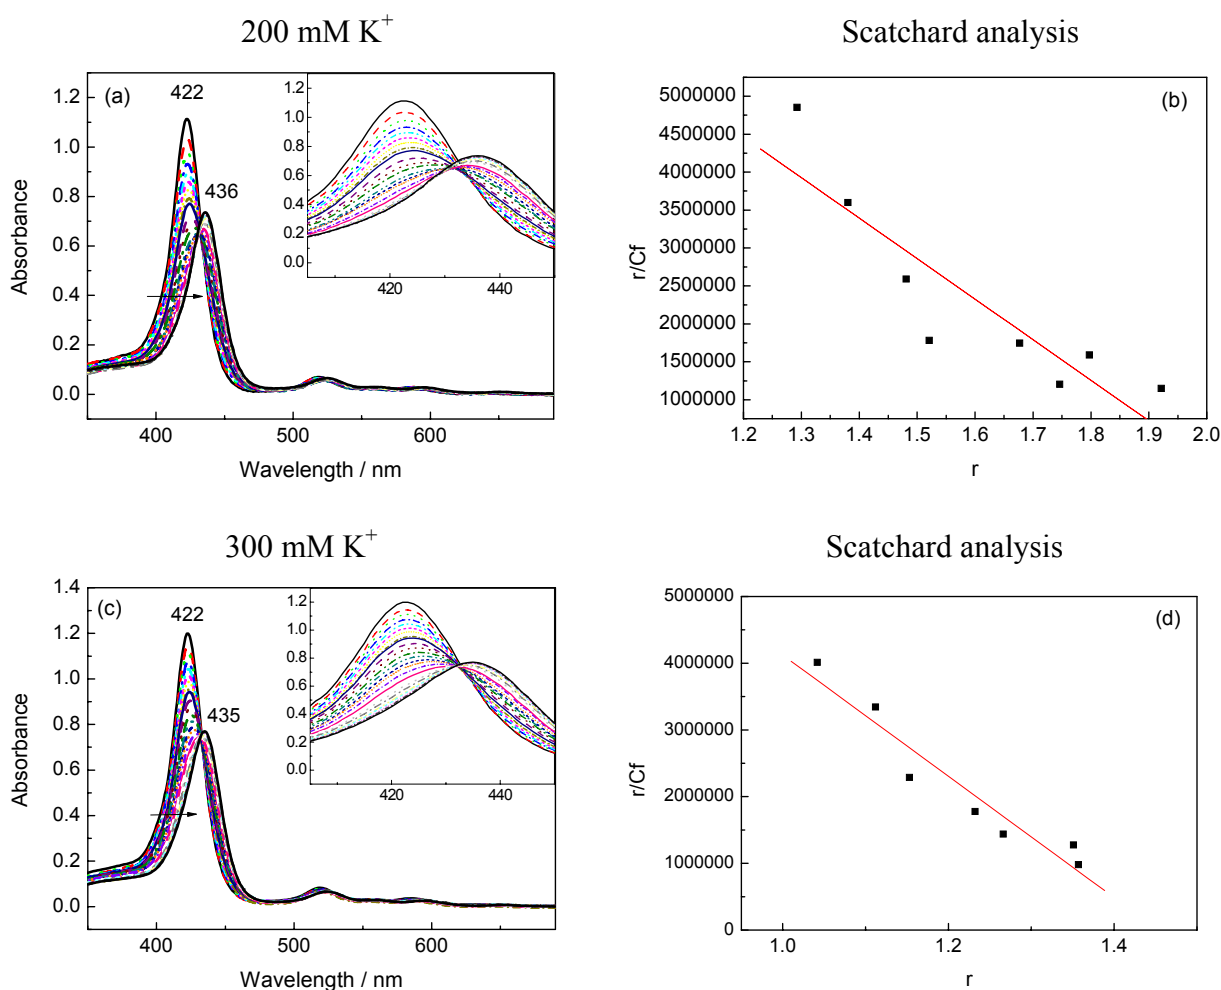

S2. Steady-state absorption spectra of TMPyP4 ( $\sim 5 \times 10^{-6}$  M) in 10 mM Tris-HCl buffer (pH = 7.2) titrated with (TTAGGG)<sub>4</sub> ( $0 \sim 5.5 \times 10^{-6}$  M along an arrow) in the presence of (a) 200 mM, and (c) 300 mM K<sup>+</sup>. Insets show the enlarged pattern of the Soret band. The Scatchard binding plots at 422 nm used to determine the binding numbers in the presence of (b) 200 mM K<sup>+</sup> ( $n=2.0$ ) and (d) 300 mM K<sup>+</sup> ( $n=1.2$ ).
